# Supplementary material for: Ratiometric and absolute water-soluble fluorescent tripodal zinc sensor and its application in killing human lung cancer cells
Source: Royal Society of Chemistry journal article supplement (doi:10.1039/c3an00067b), 2013-01-01
Supplement: c3an00067b.pdf [file c3an00067b.pdf]

## **Ratiometric and Absolute Water Soluble Fluorescent Tripodal Zinc Sensor and its Application in Killing Human Lung Cancer Cells**

**Shyamaprosad Goswami<sup>a\*</sup>, Avijit Kumar Das<sup>a</sup>, Krishnendu Aich<sup>a</sup>, Abhishek Manna<sup>a</sup>,  
Sibaprasad Maity<sup>a</sup>, Kalyani Khanra<sup>b</sup> and Nandan Bhattacharyya<sup>b</sup>**

*[a] Department of Chemistry, Bengal Engineering and Science University, Shibpur, Howrah 711103, West Bengal, India E-mail: [spgoswamical@yahoo.com](mailto:spgoswamical@yahoo.com); Fax: +91-3326682916.*

*[b] Department of Chemistry, Panskura Banamali College, Purba Medinipur, West Bengal, India*

### **CONTENTS**

|                                                                                   |              |
|-----------------------------------------------------------------------------------|--------------|
| <b>1. General methods of UV-vis and fluorescence titration experiments .....</b>  | <b>1-2</b>   |
| <b>2. Association constant determination.....</b>                                 | <b>2-3</b>   |
| <b>3. Determination of fluorescence quantum yield.....</b>                        | <b>3</b>     |
| <b>4. Calculation of the detection limit.....</b>                                 | <b>3-4</b>   |
| <b>5. <sup>1</sup>H NMR (S3) and Mass spectrum (S4) of the compound 1 .....</b>   | <b>5</b>     |
| <b>5. <sup>1</sup>H NMR (S5) and Mass spectrum (S6) of the compound 2.....</b>    | <b>6</b>     |
| <b>6. <sup>1</sup>H NMR and Mass spectrum of TAQ.....</b>                         | <b>7-8</b>   |
| <b>7. Mass spectra (S11) of TAQ and it's Zn<sup>2+</sup> complex.....</b>         | <b>9</b>     |
| <b>8. Fluorescence titration spectra of TAQ with different guest cations.....</b> | <b>10-12</b> |
| <b>9. IR spectra(Fig.7) analysis.....</b>                                         | <b>12</b>    |

## 1. General method of UV-vis and fluorescence titrations:

### By UV-vis method:

For UV-vis titrations, stock solution of the receptor was prepared in 10 μM HEPES buffer solution (at 25°C) for the titration of cations. The solution of the guest cation zinc using its perchlorate salts in the order of  $2 \times 10^{-4}$  M were also prepared in deionized water in HEPES buffer at pH = 7.4. Solutions of various concentrations containing sensor and increasing concentrations of cation were prepared separately. The spectra of these solutions were recorded by means of UV-vis methods.

### General procedure for drawing Job plot by Fluorescence method:

Stock solution of same concentration of sensor and  $\text{Zn}^{2+}$  were prepared in the order of  $\approx 1.0 \times 10^{-5}$  by using HEPES buffer solution. The intensity in each case with different *host–guest* ratio but equal in volume was recorded. Job plots were drawn by plotting  $\Delta I \cdot X_{\text{host}}$  vs  $X_{\text{host}}$  ( $\Delta I$  = change of intensity of the fluorescent spectrum during titration and  $X_{\text{host}}$  is the mole fraction of the host).

### By fluorescence method:

For fluorescence titrations, stock solution of the sensor was prepared in 10 μM in for the titration of cations in HEPES buffer at pH = 7.4 (at 25°C). The solution of the guest cations using their perchlorate in the order of 200 μM were also prepared in deionized water. Solutions of various concentrations containing sensor and increasing concentrations of cations were prepared separately. The spectra of these solutions were recorded by means of fluorescence methods.

## 2. Association constant determination:

The binding constant value of cation  $\text{Zn}^{2+}$  with the sensor has been determined from the emission intensity data following the modified Benesi–Hildebrand equation,  $1/\Delta I = 1/\Delta I_{\text{max}} + (1/K[C])(1/\Delta I_{\text{max}})$ . Here  $\Delta I = I - I_{\text{min}}$  and  $\Delta I_{\text{max}} = I_{\text{max}} - I_{\text{min}}$ , where  $I_{\text{min}}$ ,  $I$ , and  $I_{\text{max}}$  are the emission intensities of sensor considered in the absence of guest, at an intermediate concentration and at a concentration of complete saturation of guest where  $K$  is the binding constant and  $[C]$  is the guest concentration respectively. From the plot of  $(I_{\text{max}} - I_{\text{min}})/(I - I_{\text{min}})$  against  $[C]^{-1}$  for sensor, the value of  $K$  has been determined from the slope. The association constant ( $K_a$ ) as determined by fluorescence titration method for sensor with  $\text{Zn}^{2+}$  is found to be  $4 \times 10^4 \text{ M}^{-1}$  (error < 10%).

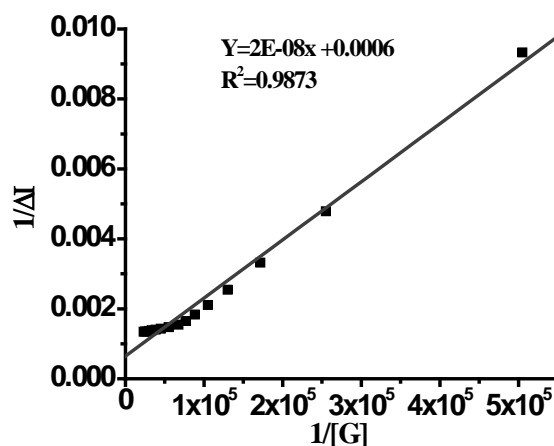

**Fig. S1:** Benesi–Hildebrand plot from fluorescence titration data of receptor (10 $\mu$ M) with Zn<sup>2+</sup>.

### 3. Determination of fluorescence quantum yield:

Here, the quantum yield  $\phi$  was measured by using the following equation,

$$\phi_x = \phi_s \left( F_x / F_s \right) \left( A_s / A_x \right) \left( n_x^2 / n_s^2 \right)$$

Where,

X & S indicate the unknown and standard solution respectively,  $\phi$  = quantum yield,

F = area under the emission curve, A = absorbance at the excitation wave length,

n = index of refraction of the solvent. Here  $\phi$  measurements were performed using anthracene in ethanol as standard [ $\phi = 0.27$ ] (error ~ 10%)

### 4. Calculation of the detection limit:

The detection limit DL of TAQ for Zn<sup>2+</sup> was determined from the following equation<sup>1</sup>:

$$DL = K * Sb1/S$$

Where K = 2 or 3 (we take 3 in this case); Sb1 is the standard deviation of the blank solution; S is the slope of the calibration curve.

From the graph Fig.S2, we get slope = 4E+07, and Sb1 value is 42.67365.

Thus using the formula we get the Detection Limit for Zn<sup>2+</sup> = 3.2  $\mu$ M.

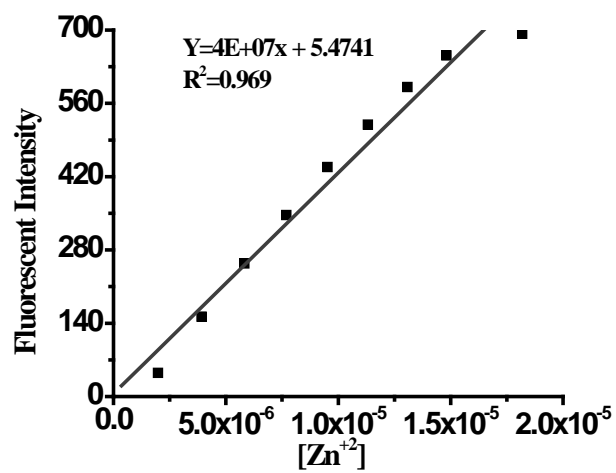

**Fig. S2:** Changes of Fluorescence Intensity of TAQ as a function of [Zn<sup>2+</sup>] at 506 nm.

### 5. <sup>1</sup>H NMR spectrum (S3) of Compound 1:

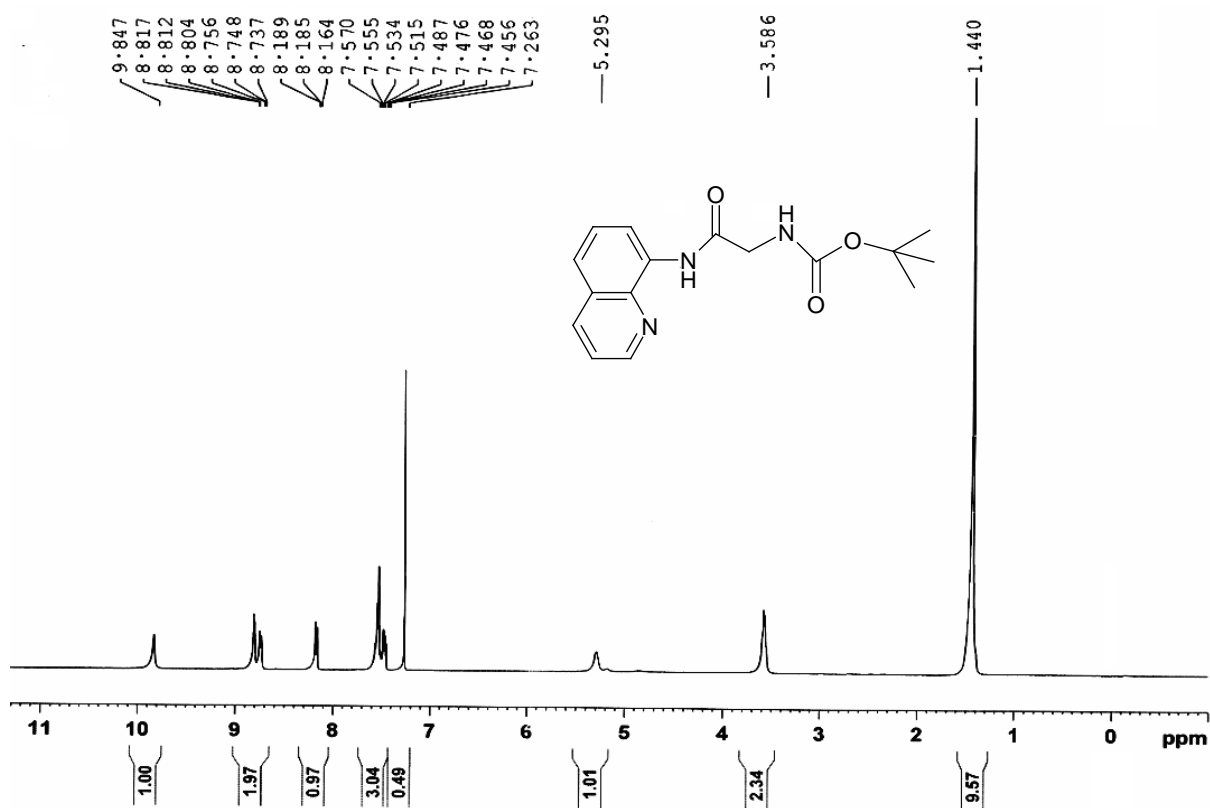

### 6. Mass spectrum (S4) of Compound 1:

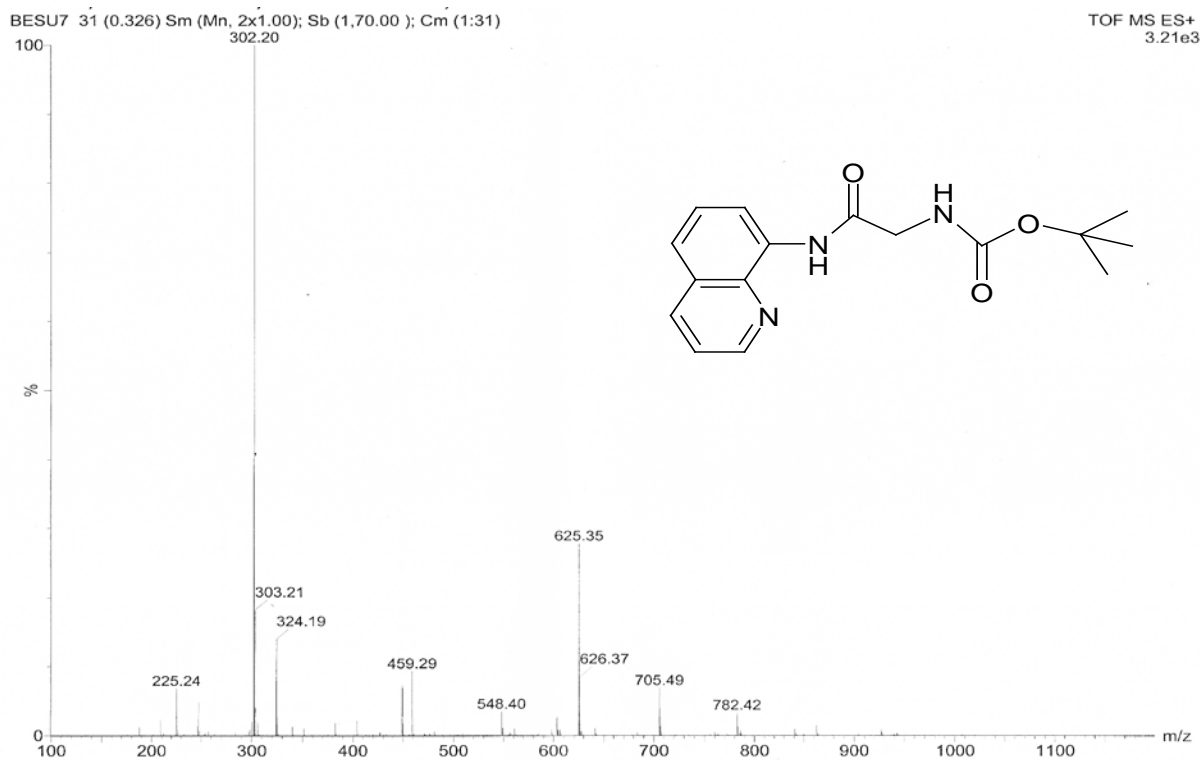

### 7. <sup>1</sup>H NMR spectrum (S5) of Compound 2:

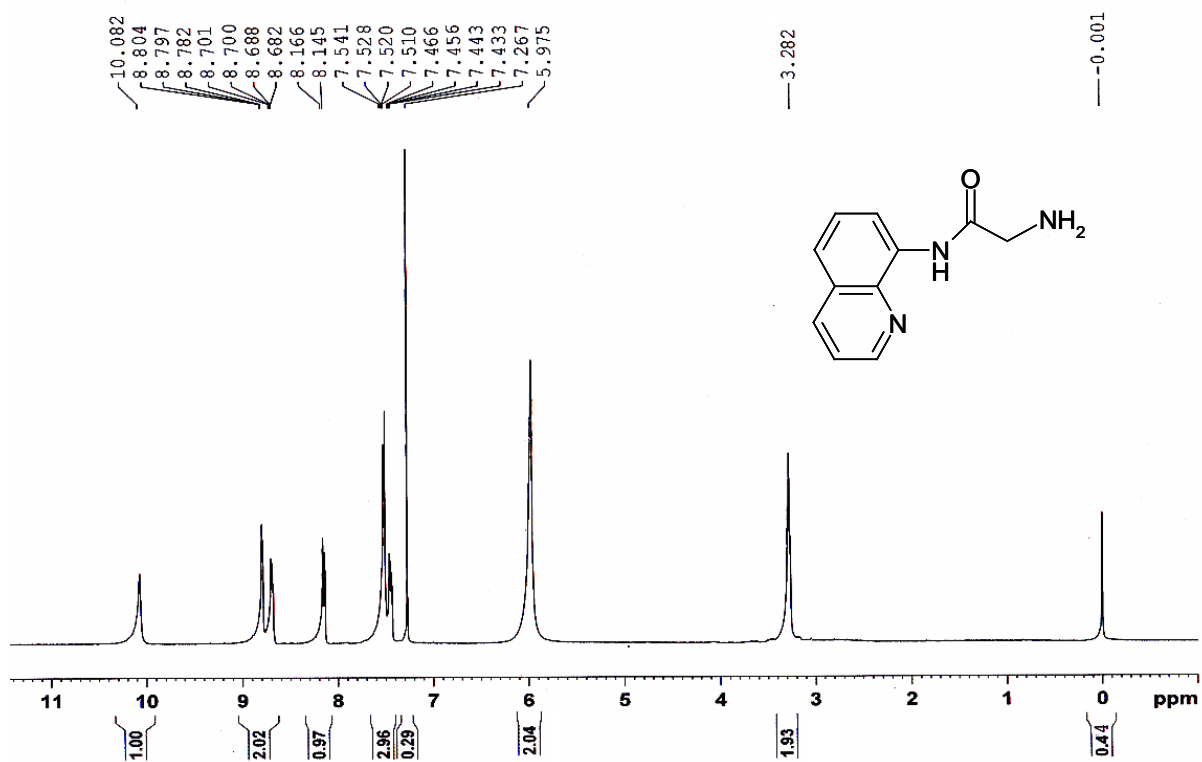

### 8. Mass spectrum (S6) of Compound 2:

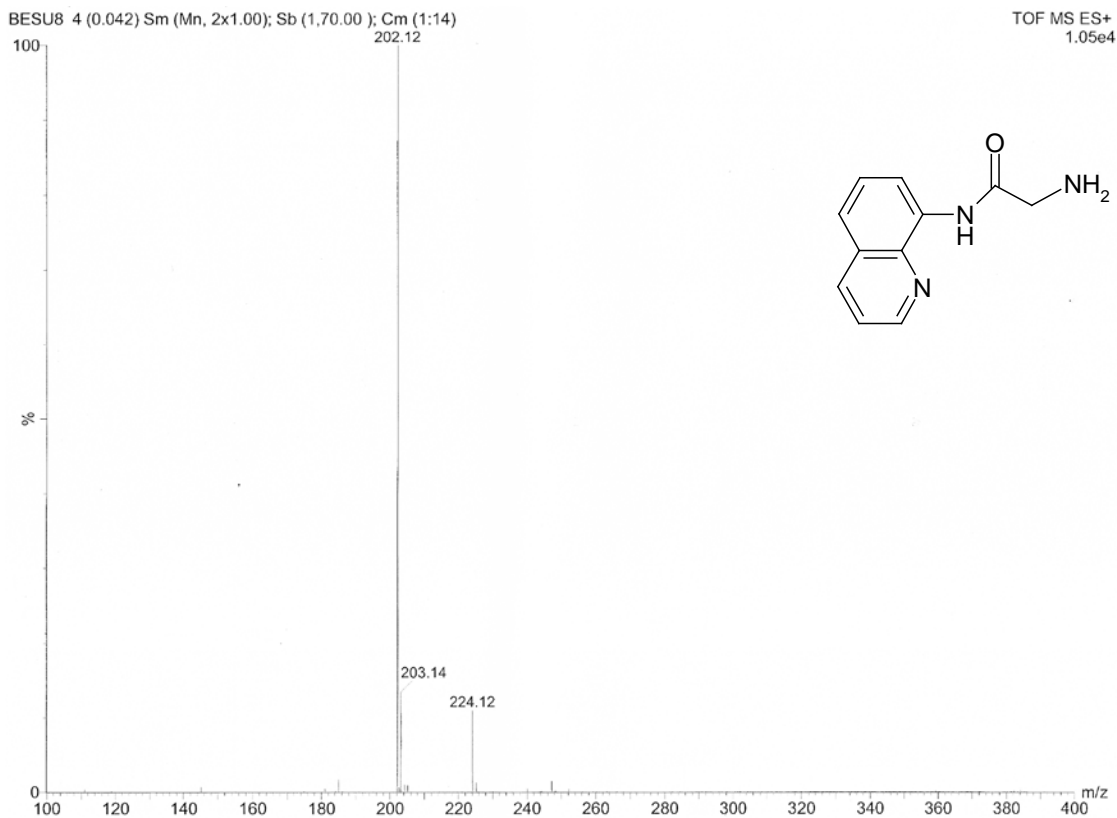

### 9. <sup>1</sup>H NMR spectrum (S7) of Compound TAQ:

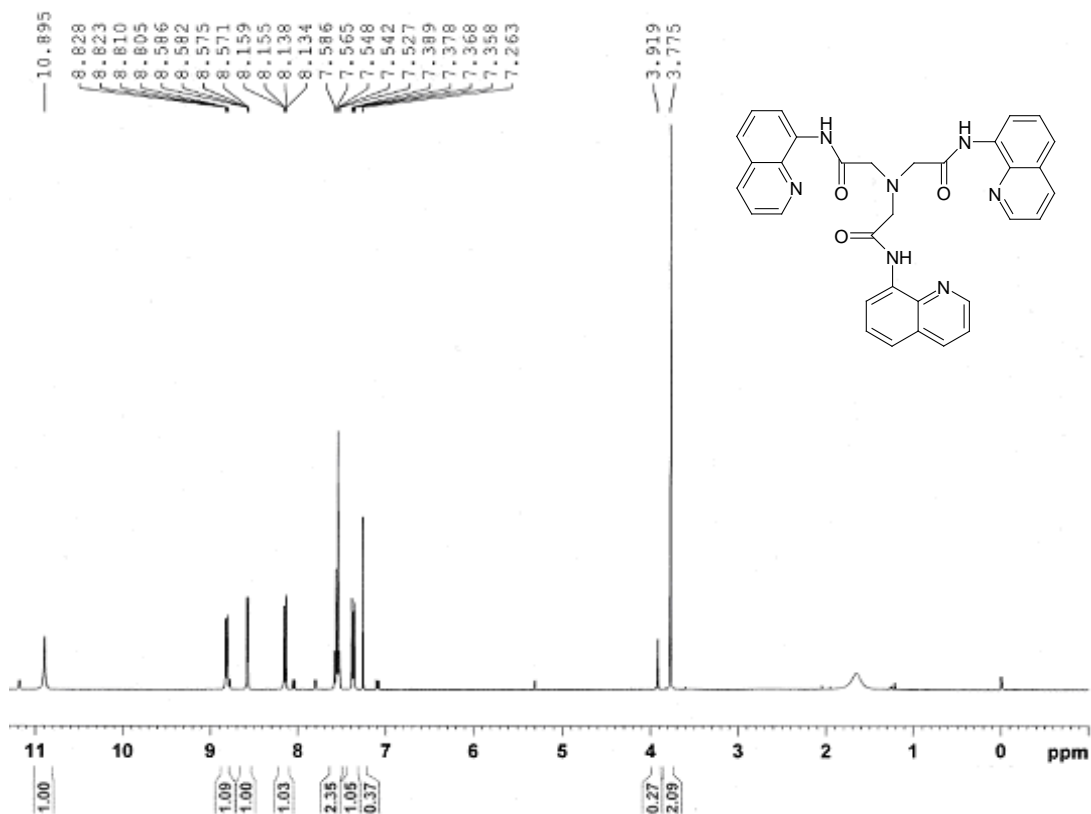

### 10. <sup>1</sup>H NMR spectrum (S8) of Compound TAQ (expansion mode):

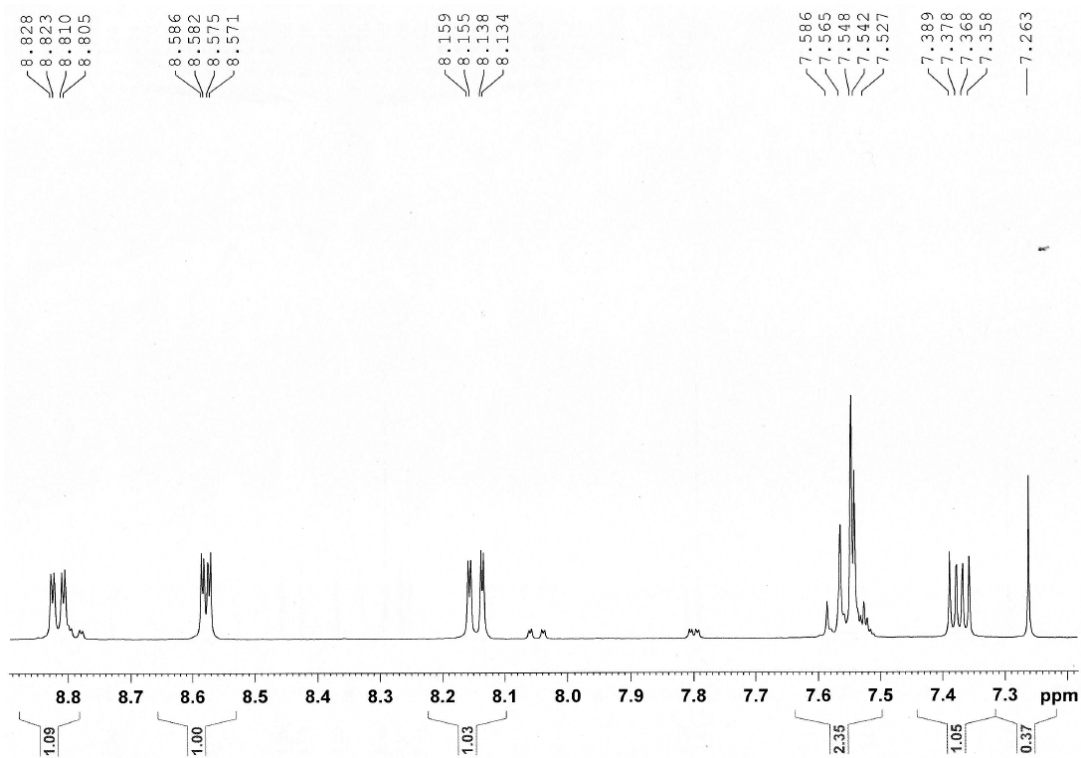

### 11. Mass spectrum (S9) of Sensor TAQ:

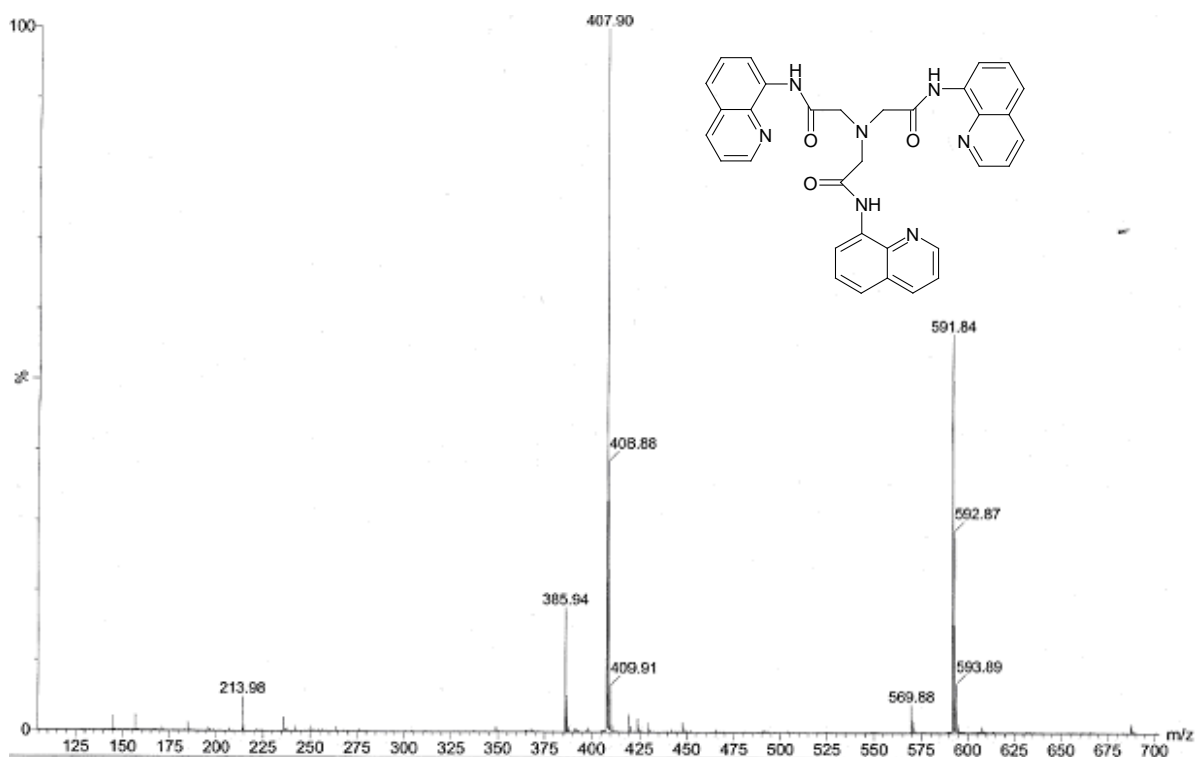

### 12. Mass spectrum (S10) of Sensor TAQ (Expansion Mode):

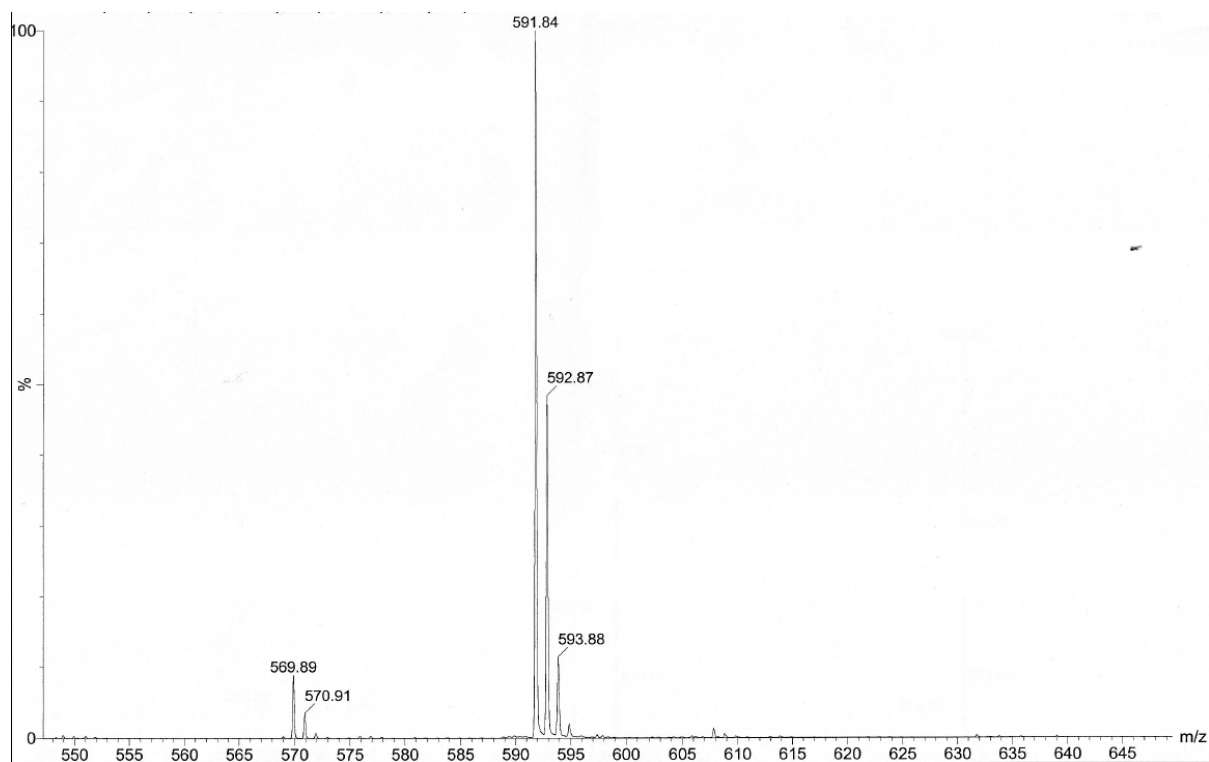



### 13. Mass spectrum (S11) of Zn<sup>2+</sup>-complex:

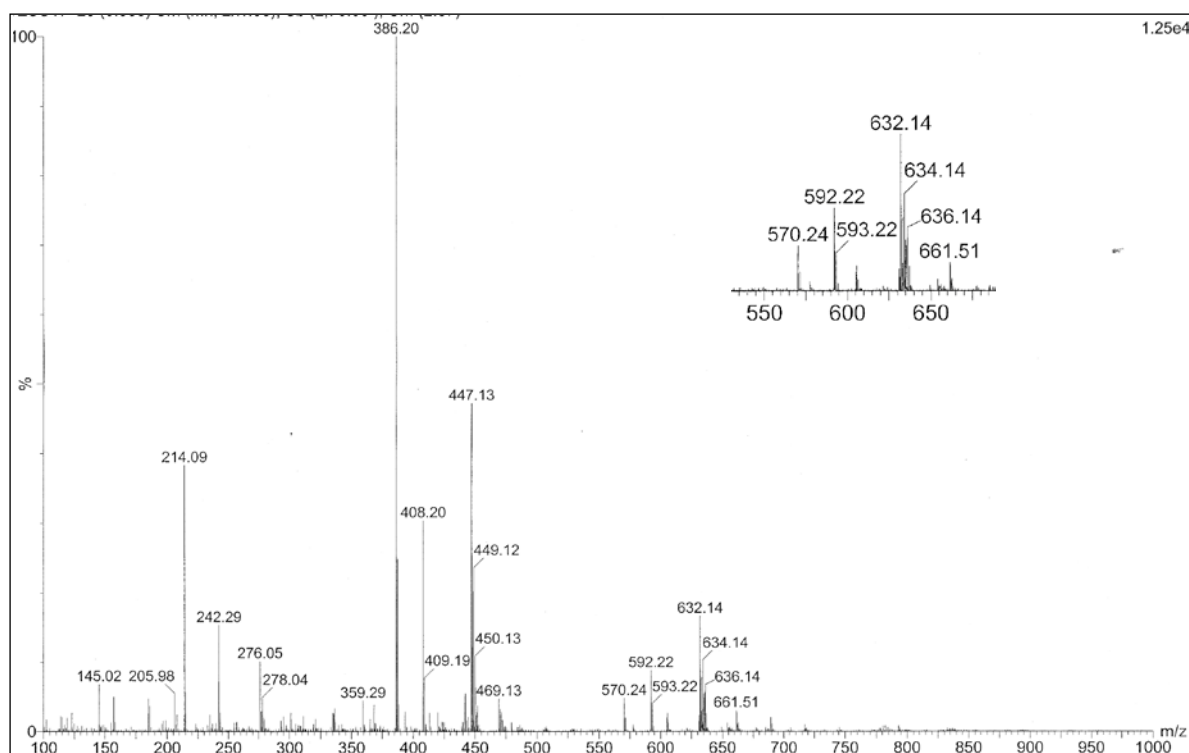

14. Fluorescence titration spectra of receptor (Fig.S12) ( $1 \times 10^{-5}$  M) with different guest cations ( $2 \times 10^{-4}$  M) in aqueous HEPES buffer solution at pH-7.4:

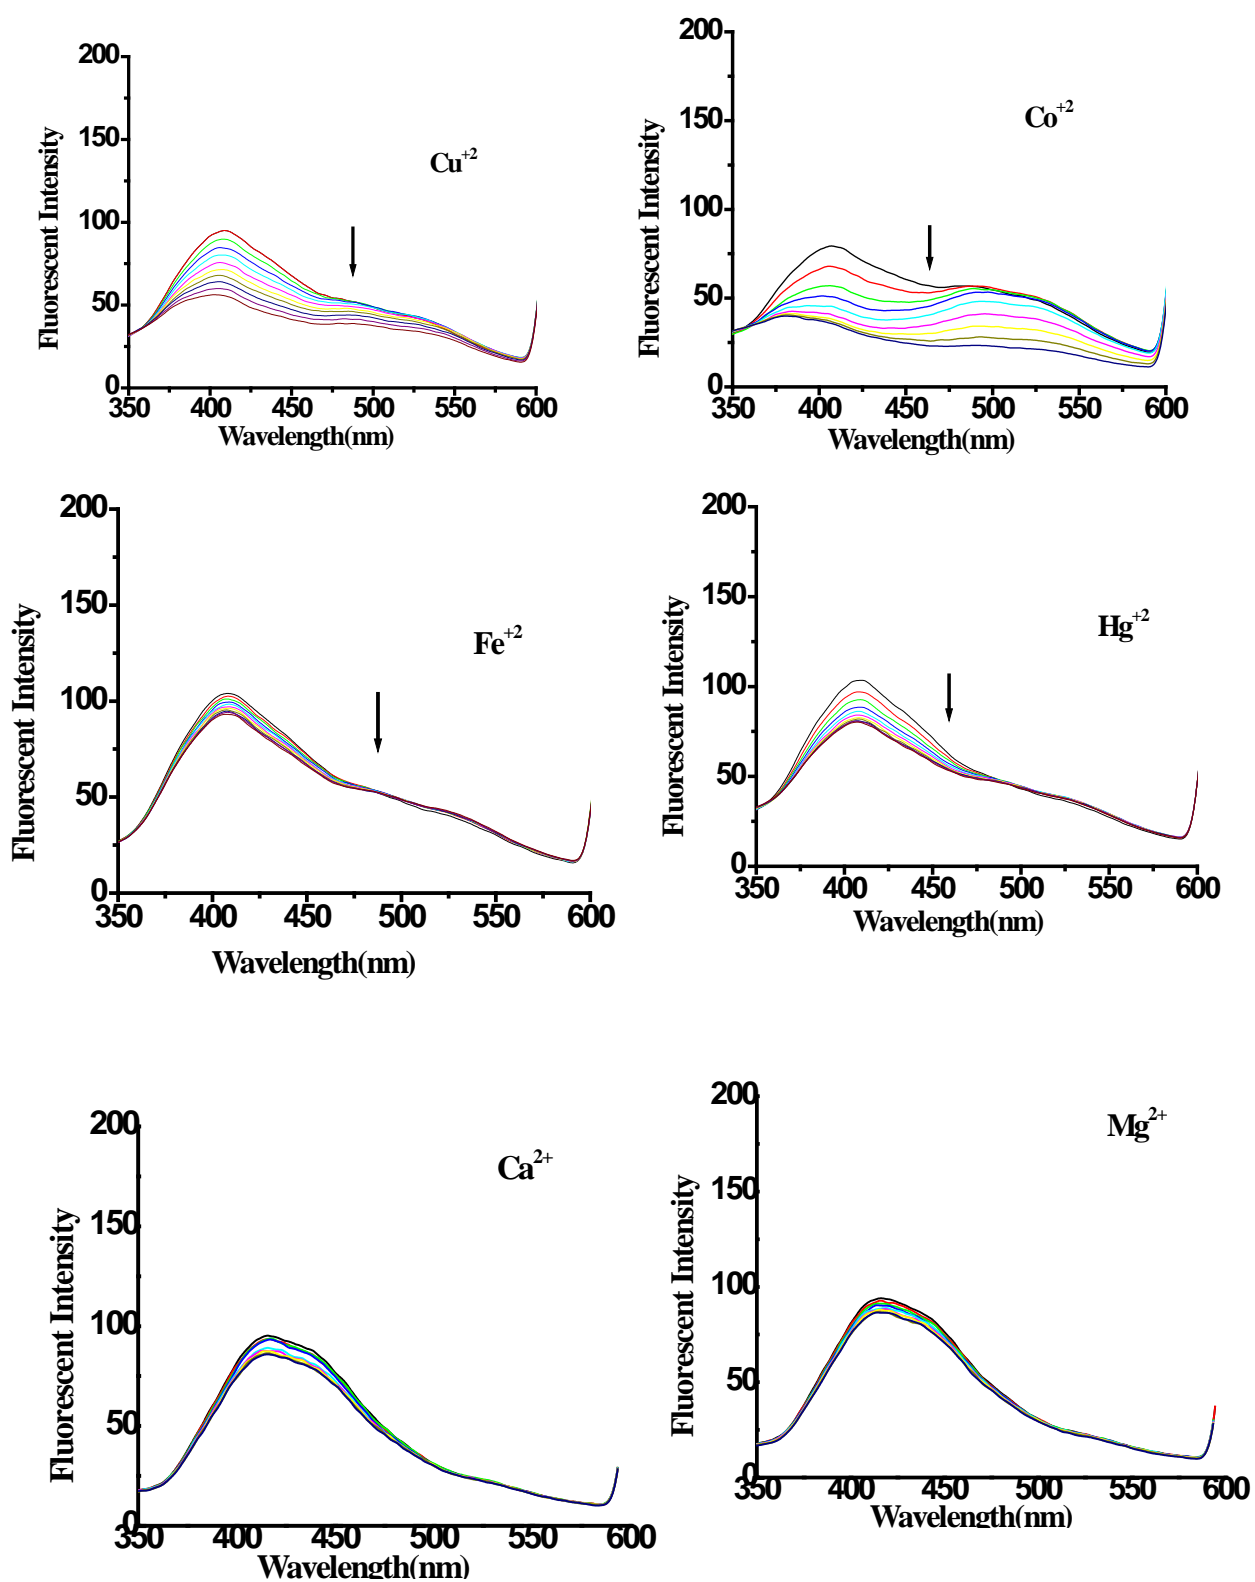

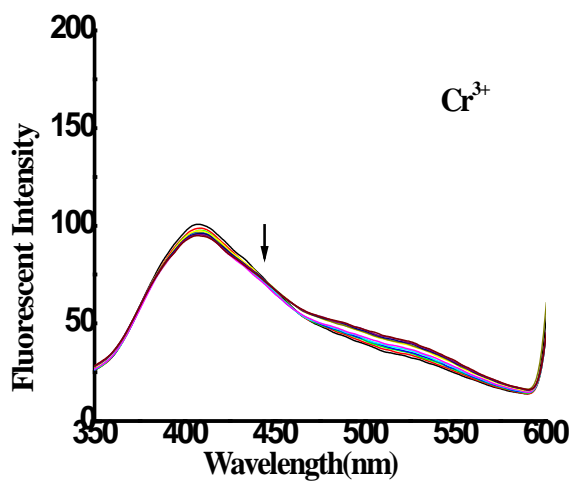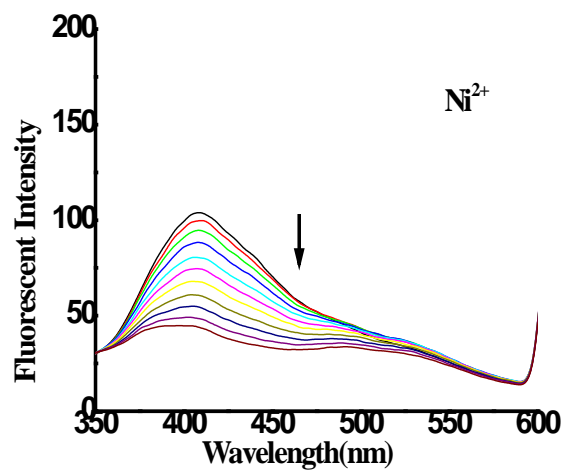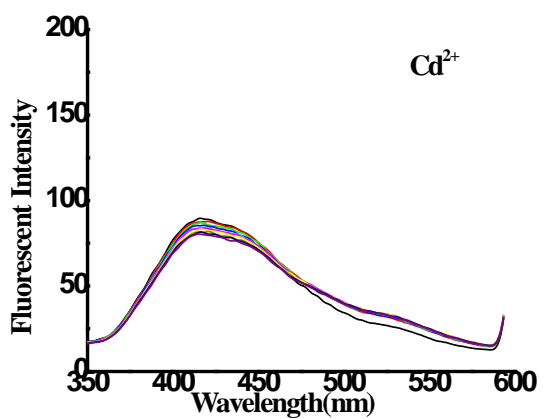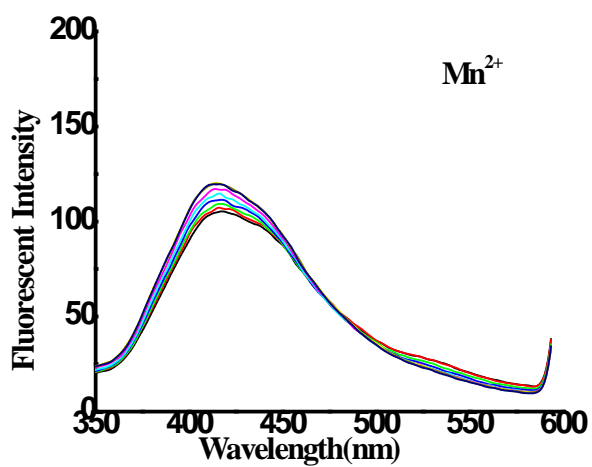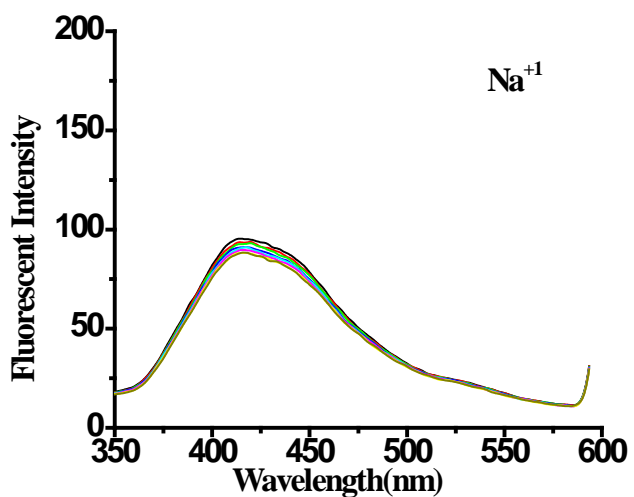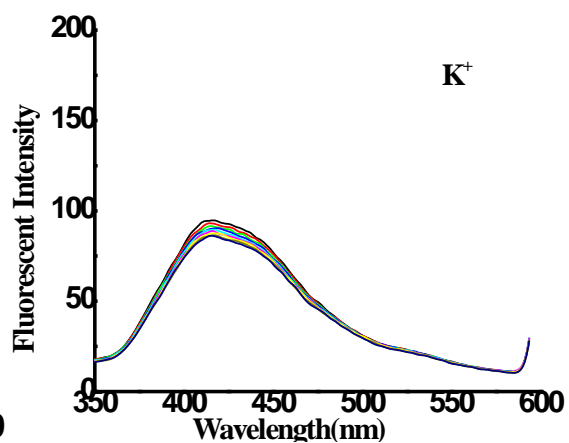

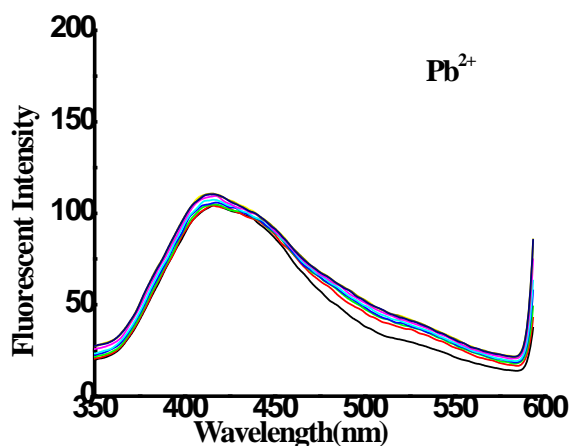

15. IR spectral analysis (Fig.S13) of Zn<sup>2+</sup> complex with TAQ :

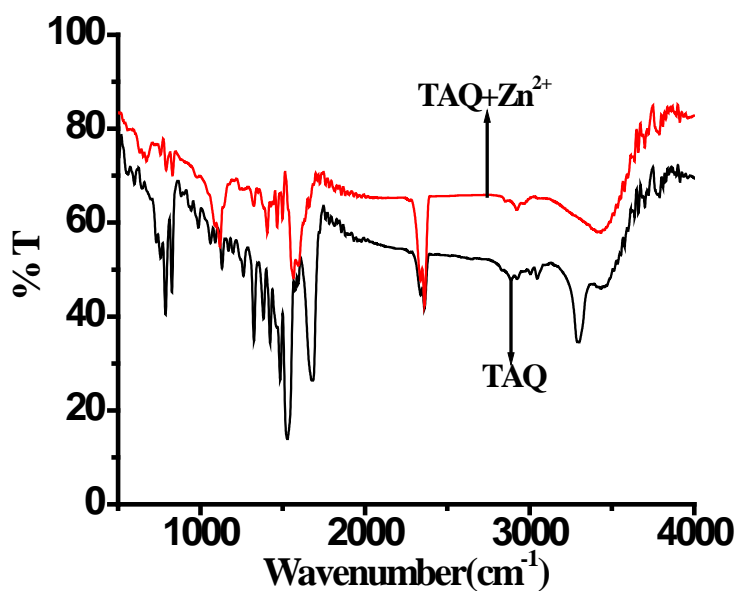

1. Zhu, M.; Yuan, M.; Liu, X.; Xu, J.; Lv, J.; Huang, C.; Liu, H.; Li, Y.; Wang, S.; Zhu, D. *Org. Lett.* 2008, **10**, 1481-1484.
